# Supplementary material for: Phenotypic Change of Mesenchymal Stem Cells Into Smooth Muscle Cells Regulated By Dynamic Cell-Surface Interactions On Patterned Arrays of Ultrathin Graphene Oxide Substrates
Source: Research Square preprint supplement (doi:10.21203/rs.3.rs-1002022/v1), 2021-10-26
Supplement: Supplementary file 1 [file 646f4f1841bbcaea4964e42c.docx]

**Graphical abstract:**


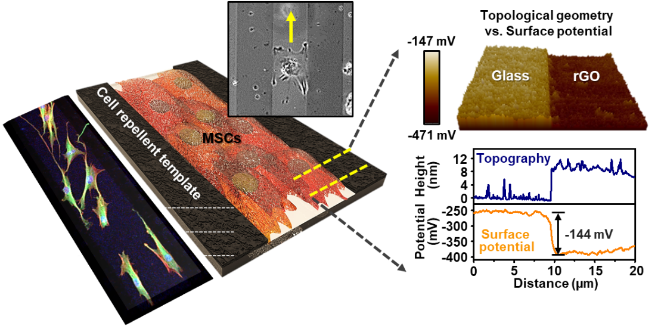


Stem cell culture platform, based on an anisotropic combination of spatial topography and surface potential, provides an opportunity for phenomenal interaction for mesenchymal stem cells by constructing differentially separated regions. Without supplying a transforming growth factor, the spatially aligned MSCs were organized and differentiated into smooth muscle cells upon the specific crosstalk between cells.
